# Supplementary material
Source: PubMed Central journal article supplement (PMC156038)
Supplement: nar_31_10_2683__1.pdf [file nar_31_10_2683__1.pdf]

## SUPPLEMENTARY MATERIAL

**Table S1**  $^1\text{H}$  NMR assignments of  $\text{rR}_{10}\text{-dY}^{\text{P}}_{10}$  obtained at 303K (non-exchangeable) and 278K (exchangeable) referenced against DSS. 5'/5'' assignments non-stereospecific. The chemical shift of some OH protons overlap with certain  $\text{NH}_2$  protons. nd not determined. 10mM Phosphate, 200 mM KCl pH 7.0.

|              | H6/8 | H5/C <sub>3</sub> H <sub>3</sub><br>H2 | 1'   | 2'   | 2''  | 3'   | 4'   | 5'/5''    | NH    | NH <sub>2</sub> | 2'OH      |
|--------------|------|----------------------------------------|------|------|------|------|------|-----------|-------|-----------------|-----------|
| <b>G1</b>    | 7.94 | -                                      | 5.62 | 4.81 | -    | 4.57 | 4.32 | 3.88/3.98 |       | nd              | nd        |
| <b>A2</b>    | 7.99 | 7.49                                   | 6.00 | 4.75 | -    | 4.53 | 4.53 | nd        | -     | 6.63,7.61       | 6.81      |
| <b>A3</b>    | 7.62 | 7.53                                   | 5.79 | 4.63 | -    | 4.51 | 4.51 | 4.14      | nd    | -               | 6.70      |
|              | 7.63 |                                        | 6.70 |      |      |      |      |           |       |                 |           |
| <b>G4</b>    | 7.03 | -                                      | 5.47 | 4.51 | -    | 4.32 | 4.45 | 4.02      | 12.14 | nd              | 6.93      |
| <b>A5</b>    | 7.57 | 7.46                                   | 5.93 | 4.69 | -    | 4.47 | 4.54 | nd        | -     | 6.70,7.61       | 6.81      |
| <b>G6</b>    | 7.11 | -                                      | 5.57 | 4.62 | -    | 4.37 | 4.47 | 4.04      | 12.12 | nd              | 6.96      |
| <b>A7</b>    | 7.59 | 7.24                                   | 5.93 | 4.69 | -    | 4.51 | 4.55 | 4.09      | -     | 6.72,7.67       | 6.69      |
| <b>A8</b>    | 7.56 | 7.53                                   | 5.84 | 4.63 | -    | 4.51 | 4.51 | nd        | -     | 6.72,7.83       | 6.74      |
| <b>G9</b>    | 7.19 | -                                      | 5.66 | 4.36 | -    | 4.50 | 4.42 | 4.02      | 13.20 | nd              | 7.05      |
| <b>C10</b>   | 7.46 | 5.25                                   | 5.76 | 4.00 | -    | 4.12 | 4.18 | nd        |       | -               | 7.08,8.15 |
|              | nd   |                                        |      |      |      |      |      |           |       |                 |           |
| <b>G11</b>   | 7.99 | -                                      | 6.07 | 2.83 | 2.95 | 4.84 | 4.24 | 3.83      | 3.95  | nd              | -         |
| <b>C P12</b> | 7.55 | 1.99                                   | 6.28 | 2.45 | 2.81 | 4.85 | 4.43 | 4.20      | 4.27  | 6.70,9.10       | -         |
| <b>UP13</b>  | 7.73 | 1.99                                   | 6.17 | 2.37 | 2.80 | 4.89 | 4.37 | 4.20,4.28 |       | 14.38           | - -       |
| <b>U P14</b> | 7.80 | 2.04                                   | 6.19 | 2.38 | 2.79 | 4.89 | 4.40 | 4.21,4.27 |       | 13.84           | - -       |
| <b>C P15</b> | 7.59 | 2.05                                   | 6.03 | 2.32 | 2.72 | 4.78 | 4.34 | nd        | -     | 6.71,8.70       | -         |
| <b>U P16</b> | 7.70 | 1.99                                   | 6.13 | 2.34 | 2.76 | 4.87 | 4.34 | 4.18,4.23 |       | 14.00           | - -       |
| <b>C P17</b> | 7.61 | 2.03                                   | 6.04 | 2.38 | 2.72 | 4.77 | 4.33 | nd        | -     | 6.71,8.73       | -         |
| <b>UP18</b>  | 7.66 | 1.98                                   | 6.01 | 2.36 | 2.71 | 4.87 | 4.28 | nd        | 14.12 | -               | -         |
| <b>U P19</b> | 7.95 | 2.02                                   | 6.18 | 2.31 | 2.67 | 4.89 | 4.31 | nd        | 14.03 | -               | -         |
| <b>C20</b>   | 7.58 | 5.63                                   | 6.26 | 2.16 | 2.23 | 4.54 | 4.06 | nd        | -     | 7.03,8.20       | -         |

**Table S2**  $^1\text{H}$  NMR assignments of dR10-rYM10 obtained at 303K (non-exchangeable) and 278K (exchangeable) referenced against DSS. nd not determined. U<sup>Me</sup> – deoxyuracil.

|                         | H6/8 | H5/Me | 1'   | 2'   | 2''  | 3'   | 4'   | NH    | NH <sub>2</sub> |
|-------------------------|------|-------|------|------|------|------|------|-------|-----------------|
|                         | H2   |       |      |      |      |      |      |       |                 |
| <b>G1</b>               | 7.83 | -     | 5.75 | 2.47 | 2.66 | 4.82 | 4.17 | 12.66 | 6.76            |
| <b>A2</b>               | 8.15 | 7.41  | 6.06 | 2.77 | 2.92 | 5.05 | 4.40 | -     | 7.9, 6.43       |
| <b>A3</b>               | 7.95 | 7.38  | 6.05 | 2.66 | 2.81 | 5.00 | 4.44 | -     | 7.8, 6.12       |
| <b>G4</b>               | 7.33 | -     | 5.73 | 2.47 | 2.67 | 4.88 | 4.36 | 12.56 |                 |
| <b>A5</b>               | 7.80 | 7.38  | 6.13 | 2.64 | 2.83 | 4.95 | 4.41 | -     |                 |
| <b>G6</b>               | 7.26 | -     | 5.71 | 2.41 | 2.65 | 4.87 | 4.33 | 12.57 | 7.8, 6.3        |
| <b>A7</b>               | 7.79 | 7.19  | 6.06 | 2.56 | 2.84 | 4.98 | 4.44 | -     | 7.85, 6.2       |
| <b>A8</b>               | 7.83 | 7.38  | 5.99 | 2.60 | 2.74 | 4.97 | 4.40 | -     | 7.70, 6.25      |
| <b>G9</b>               | 7.39 | -     | 5.89 | 2.42 | 2.62 | 4.82 | 4.36 | 13.12 | 8.05, 6.10      |
| <b>C10</b>              | 7.29 | 5.05  | 6.14 | 2.07 | 2.24 | 4.45 | 4.07 | -     | 8.1, 6.55       |
| <b>G11</b>              | 7.84 | -     | 5.54 | 4.73 | -    | nd   | nd   | 12.73 |                 |
| <b>C12</b>              | 7.70 | 5.21  | 5.49 | 4.44 | -    | nd   | nd   | -     | 8.37, 6.77      |
| <b>U<sup>Me</sup>13</b> |      | 7.81  | 1.60 | 5.48 | 4.47 | -    | nd   | nd    | 14.24           |
| <b>U<sup>Me</sup>14</b> |      | 7.91  | 1.64 | 5.67 | 4.58 | -    | nd   | nd    | 13.88           |
| <b>C15</b>              | 7.81 | 5.66  | 5.41 | 4.38 | -    | nd   | nd   | -     | 8.45, 7.05      |
| <b>U<sup>Me</sup>16</b> |      | 7.81  | 1.57 | 5.37 | 4.56 | -    | nd   | nd    | 14.28           |
| <b>C17</b>              | 7.79 | 5.66  | 5.41 | 4.40 | -    | nd   | nd   | -     | 8.40, 7.03      |
| <b>U<sup>Me</sup>18</b> |      | 7.82  | 1.63 | 5.40 | 4.32 | -    | nd   | nd    | 14.06           |
| <b>U<sup>Me</sup>19</b> |      | 7.88  | 1.70 | 5.80 | 4.21 | -    | nd   | nd    | 14.16           |
| <b>C20</b>              | 7.83 | 5.81  | 5.93 | 4.06 | -    | nd   | nd   | -     | 8.22,<br>7.10   |

**Table S3**  $^1\text{H}$  NMR assignments of rR<sub>10</sub>-dYU<sub>10</sub> obtained at 303K (non-exchangeable) and 278K (exchangeable) referenced against DSS. nd not determined, nv not visible.

|            | H6/8 | H5   | 1'   | 2'   | 2''  | 3'   | 4'    | NH    | NH <sub>2</sub> |
|------------|------|------|------|------|------|------|-------|-------|-----------------|
| <b>H2</b>  |      |      |      |      |      |      |       |       |                 |
| <b>G1</b>  | 7.92 | -    | 5.58 | 4.78 | -    | 4.59 | 4.32  | nv    | -               |
| <b>A2</b>  | 8.03 | 7.39 | 5.93 | 4.67 | -    | 4.58 | 4.52  | -     | -               |
| <b>A3</b>  | 7.81 | 7.55 | 5.84 | 4.61 | -    | 4.60 | 4.50  | -     | -               |
| <b>G4</b>  | 7.12 | -    | 5.45 | 4.46 | -    | 4.42 | 4.42  | 12.39 | -               |
| <b>A5</b>  | 7.66 | 7.56 | 5.85 | 4.63 | -    | 4.57 | 4.45  | -     | -               |
| <b>G6</b>  | 7.11 | -    | 5.48 | 4.51 | -    | 4.43 | 4.43  | 12.42 | -               |
| <b>A7</b>  | 7.70 | 7.30 | 5.83 | 4.60 | -    | 4.50 | 4.485 | -     | -               |
| <b>A8</b>  | 7.75 | 7.60 | 5.80 | 4.51 | -    | 4.49 | 4.59  | -     | -               |
| <b>G9</b>  | 7.39 | -    | 5.67 | 4.17 | -    | 4.51 | 4.39  | 13.47 | -               |
| <b>C10</b> | 7.54 | 5.35 | 5.81 | 3.98 | -    | 4.16 | 4.16  | -     | 7.06, 8.28      |
| <b>G11</b> | 8.05 | -    | 6.03 | 2.77 | 2.77 | 4.83 | nd    | nv    | -               |
| <b>C12</b> | 7.65 | 5.43 | 6.17 | 2.42 | 2.62 | 4.83 | nd    | -     | 6.93, 8.68      |
| <b>U13</b> | 7.71 | 5.44 | 6.15 | 2.35 | 2.67 | 4.89 | nd    | 14.44 | -               |
| <b>U14</b> | 7.73 | 5.55 | 6.10 | 2.35 | 2.67 | 4.89 | nd    | 13.86 | -               |
| <b>C15</b> | 7.56 | 5.64 | 6.06 | 2.28 | 2.56 | 4.78 | nd    | -     | 7.05, 8.28      |
| <b>U16</b> | 7.59 | 5.28 | 6.05 | 2.29 | 2.63 | 4.86 | nd    | 14.05 | -               |
| <b>C17</b> | 7.57 | 5.62 | 6.03 | 2.28 | 2.56 | 4.86 | nd    | -     | 7.06, 8.32      |
| <b>U18</b> | 7.59 | 5.29 | 6.08 | 2.25 | 2.61 | 4.86 | nd    | 13.96 | -               |
| <b>U19</b> | 7.68 | 5.51 | 6.17 | 2.25 | 2.61 | 4.87 | nd    | 13.91 | -               |
| <b>C20</b> | 7.55 | 5.64 | 6.24 | 2.14 | 2.22 | 4.53 | nd    | -     | 7.04, 8.20      |

**Table S4.** deoxyribose conformational parameters in DNA.RNA hybrids.

Data refer to the italicised strand.  $\Sigma 3'$  includes  $^3J_{H3'-P}$  (4-6Hz). Values of Ps and fs calculated as described previously (10). Standard deviations were estimated as  $\pm 0.5$  Hz ( $\Sigma 1'$ ),  $\pm 1$  ( $\Sigma 2'$ ) and  $\pm 2$  ( $\Sigma 2''$ ,  $\Sigma 3'$ ). Errors on Ps and fs estimated at  $\pm 20^\circ$  and 0.1 respectively.

| <i>dR10-rYM10</i> |                    |             |              |             |             |                        | <i>rR10-dYU10</i> |             |             |      |
|-------------------|--------------------|-------------|--------------|-------------|-------------|------------------------|-------------------|-------------|-------------|------|
| Base              | $\Sigma 1'$        | $\Sigma 2'$ | $\Sigma 2''$ | $\Sigma 3'$ | $r_{1'-4'}$ | fs/<br>Ps ( $^\circ$ ) | Base              | $\Sigma 1'$ | $\Sigma 3'$ | fs   |
|                   |                    |             |              |             | Hz          | Å                      |                   |             |             |      |
|                   |                    |             |              |             | Hz          | Å                      |                   |             |             |      |
| <b>G1</b>         | nd                 | nd          | nd           | nd          | nd          | nd                     | <b>G11</b>        | 14.84       | 10.99       | 0.84 |
| <b>A2</b>         | 15.38              | 26.37       | 20.33        | 9.62        | 2.99        | 1/<br>162              | <b>C12</b>        | nd          | 12.64       | nd   |
| <b>A3</b>         | nd                 | 26.37       | nd           | 10.44       | 2.56        | nd                     | <b>U13</b>        | 15.38       | nd          | 1.0  |
| <b>G4</b>         | nd                 | nd          | nd           | nd          | 2.91        | nd                     | <b>U14</b>        | nd          | nd          | nd   |
| <b>A5</b>         | 14.29              | 26.37       | 23.08        | nd          | 3.32        | 0.79/<br>160           | <b>C15</b>        | nd          | nd          | nd   |
| <b>G6</b>         | nd                 | 26.37       | nd           | 9.89        | 2.73        | nd                     | <b>U16</b>        | nd          | nd          | nd   |
| <b>A7</b>         | 13.19 <sup>b</sup> | nd          | nd           | 9.89        | 2.56        | 1/<br>162              | <b>C17</b>        | nd          | nd          | nd   |
| <b>A8</b>         | 13.74              | 27.47       | 23.08        | nd          | 3.04        | 0.74/<br>179           | <b>U18</b>        | 13.74       | nd          | 0.69 |

|             |       |       |       |      |      |              |            |       |       |       |
|-------------|-------|-------|-------|------|------|--------------|------------|-------|-------|-------|
| <b>G9</b>   | 13.55 | 26.37 | 23.63 | nd   | 3.01 | 0.70/<br>179 | <b>U19</b> | 13.19 | nd    | 0.601 |
| <b>C10</b>  | 13.74 | 26.69 | 24.32 | 9.89 | 3.11 | 1.0/<br>200  | <b>C20</b> | 13.19 | 10.99 | 0.6   |
| <b>Mean</b> | 13.98 | 26.58 | 22.89 | 9.94 | 2.91 | 0.87/173     | 14.07      | 11.54 | 0.746 |       |
| <b>s.d.</b> | 0.77  | 0.412 | 1.52  | 0.3  | 0.26 | 0.14/15.7    | 0.998      | 0.952 | 0.172 |       |

---

**Table S5.** Electrophoretic mobility

| Duplex                    | $\mu_{rel}$ |
|---------------------------|-------------|
| dR10·dY10 <sup>a</sup>    | 1.0         |
| dR10·rY10 <sup>a</sup>    | 0.92        |
| dR10·rY(T)10              | 0.87        |
| rR10·dY(U)10 <sup>a</sup> | 0.87        |
| rR10·dY(10) <sup>a</sup>  | 0.84        |
| rR10·d <sup>P</sup> Y(10) | 0.79        |
| rR10·rY(10) <sup>a</sup>  | 0.77        |

<sup>a</sup> from [8]
